# Supplementary material for: Risk profiling of patients with relapsed/refractory diffuse large B-cell lymphoma by measuring circulating tumor DNA
Source: PubMed Central journal article supplement — Blood Adv. 2022 Mar 11;6(6):1651–60. doi: 10.1182/bloodadvances.2021006415 (PMC8941482; doi:10.1182/bloodadvances.2021006415), 2022-03-11
Supplement: advancesADV2021006415-suppl1.pdf [file advancesADV2021006415-suppl1.pdf]

**Risk profiling of patients with relapsed/refractory diffuse large B-cell lymphoma by measuring circulating tumor DNA. Herrera et al.**

**Supplementary Table 1.** Distribution of most frequently mutated genes, in patients with and without ctDNA clearance at EOT

| Genes           | BEP* (n = 23) | ctDNA cleared (n=11) |     | ctDNA not cleared (n=12) |     |
|-----------------|---------------|----------------------|-----|--------------------------|-----|
|                 |               | Baseline             | EOT | Baseline                 | EOT |
| Linker histones | 10            | 5                    | 0   | 5                        | 5   |
| <i>TP53</i>     | 9             | 2                    | 0   | 7                        | 6   |
| <i>CREBBP</i>   | 6             | 2                    | 0   | 4                        | 3   |
| <i>CARD11</i>   | 6             | 2                    | 0   | 4                        | 2   |
| <i>LRRN3</i>    | 6             | 4                    | 0   | 2                        | 2   |
| <i>PIM1</i>     | 6             | 2                    | 0   | 4                        | 4   |
| <i>BCL2</i>     | 4             | 0                    | 0   | 4                        | 3   |
| <i>BTG2</i>     | 4             | 3                    | 0   | 1                        | 0   |
| <i>BCL10</i>    | 3             | 2                    | 0   | 1                        | 0   |
| <i>NOTCH2</i>   | 3             | 2                    | 0   | 1                        | 0   |

\*Patients with paired baseline and EOT samples.

BEP, biomarker-evaluable population; ctDNA, circulating tumor DNA; EOT, end-of-treatment.

**Supplementary Figure 1.** Investigator-assessed PFS in the ITT population and BEP

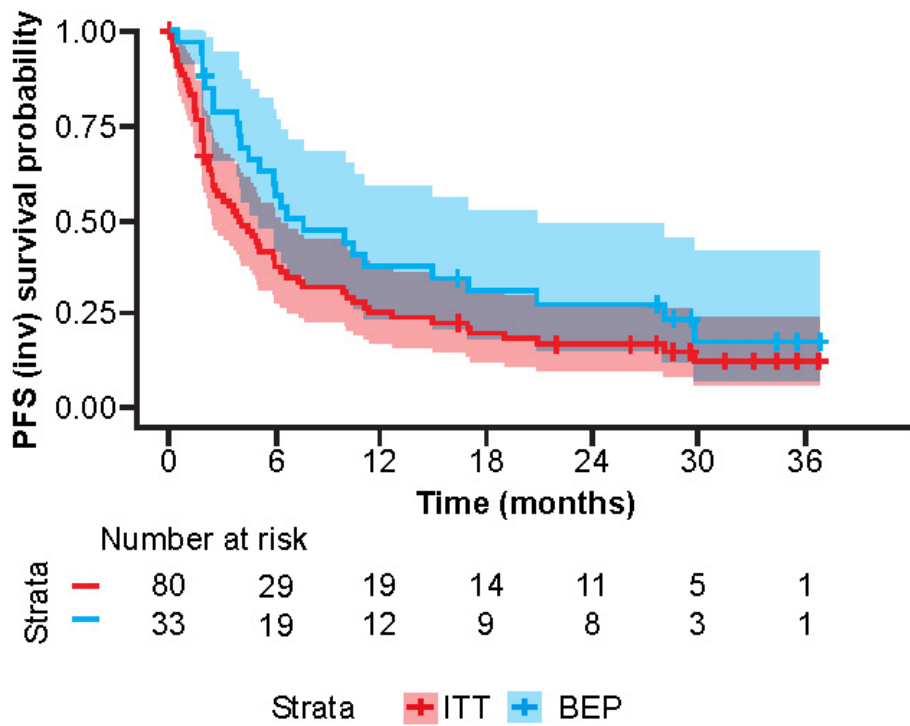

BEP, biomarker-evaluable population; INV, investigator-assessed; ITT, intention-to-treat;

PFS, progression-free survival.

**Supplementary Figure 2.** Distribution of all variants in ctDNA at baseline in 33 individual patients

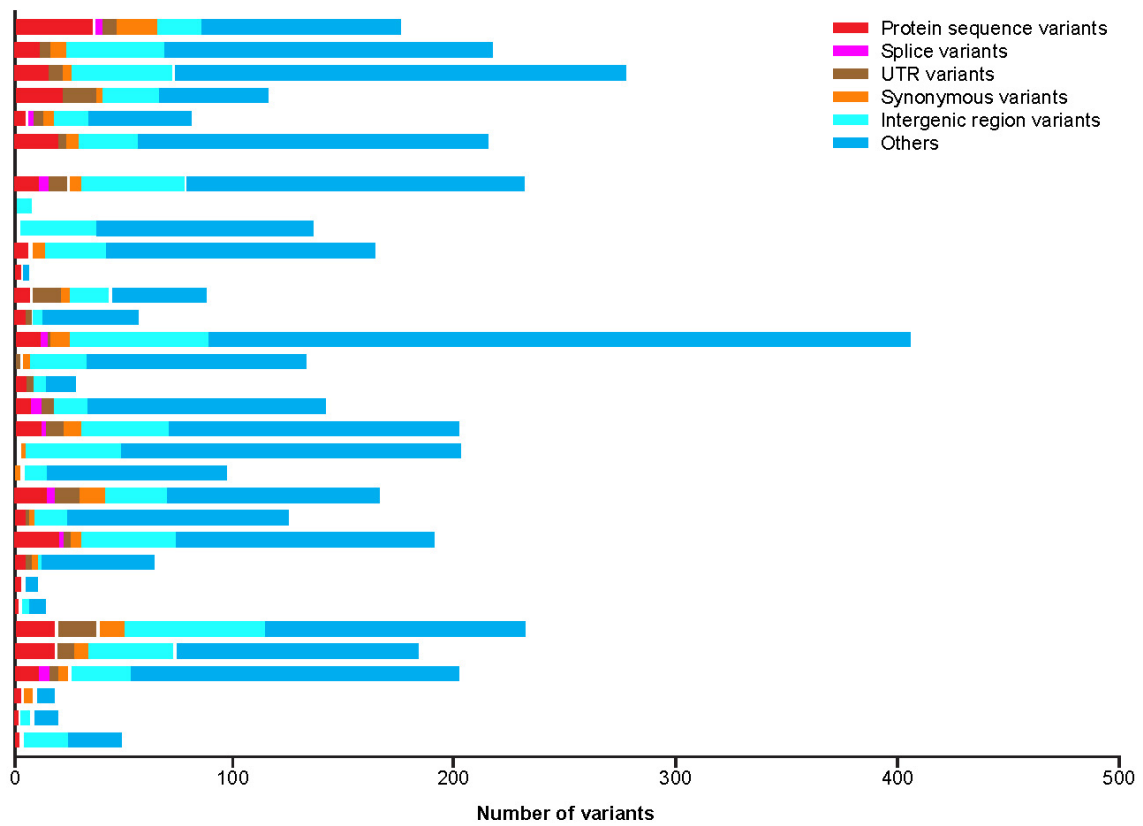

ctDNA, circulating tumor DNA; UTR, untranslated region.

**Supplementary Figure 3.** ctDNA levels in 11 individual patients with ctDNA\* clearance at EOT

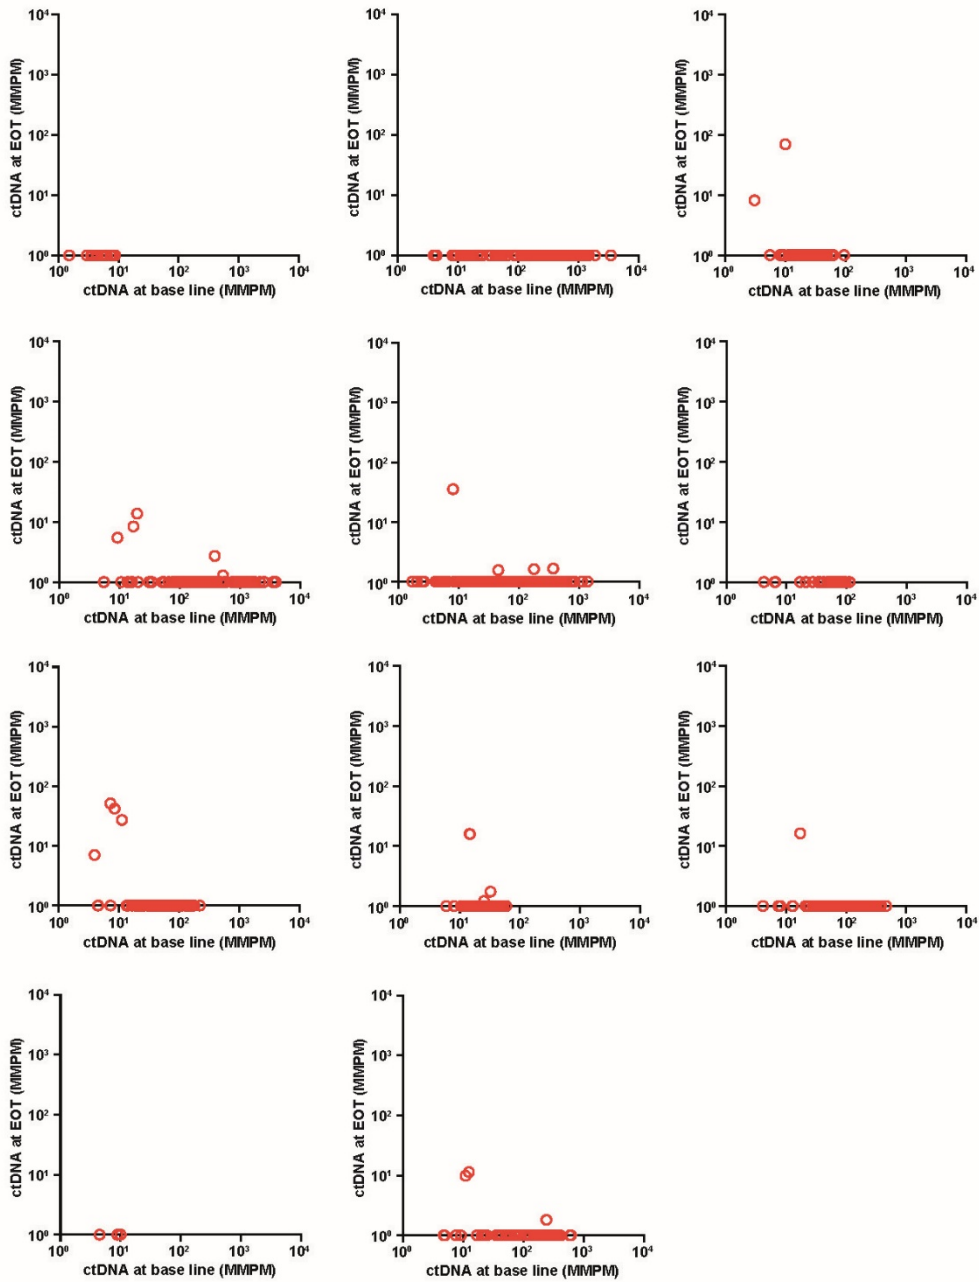

\*All variants of ctDNA are shown.

ctDNA, circulating tumor DNA; EOT, end of treatment; MPPM, mutant molecules per mL.

**Supplementary Figure 4.** ctDNA levels in 12 individual patients with ctDNA\* not cleared at EOT

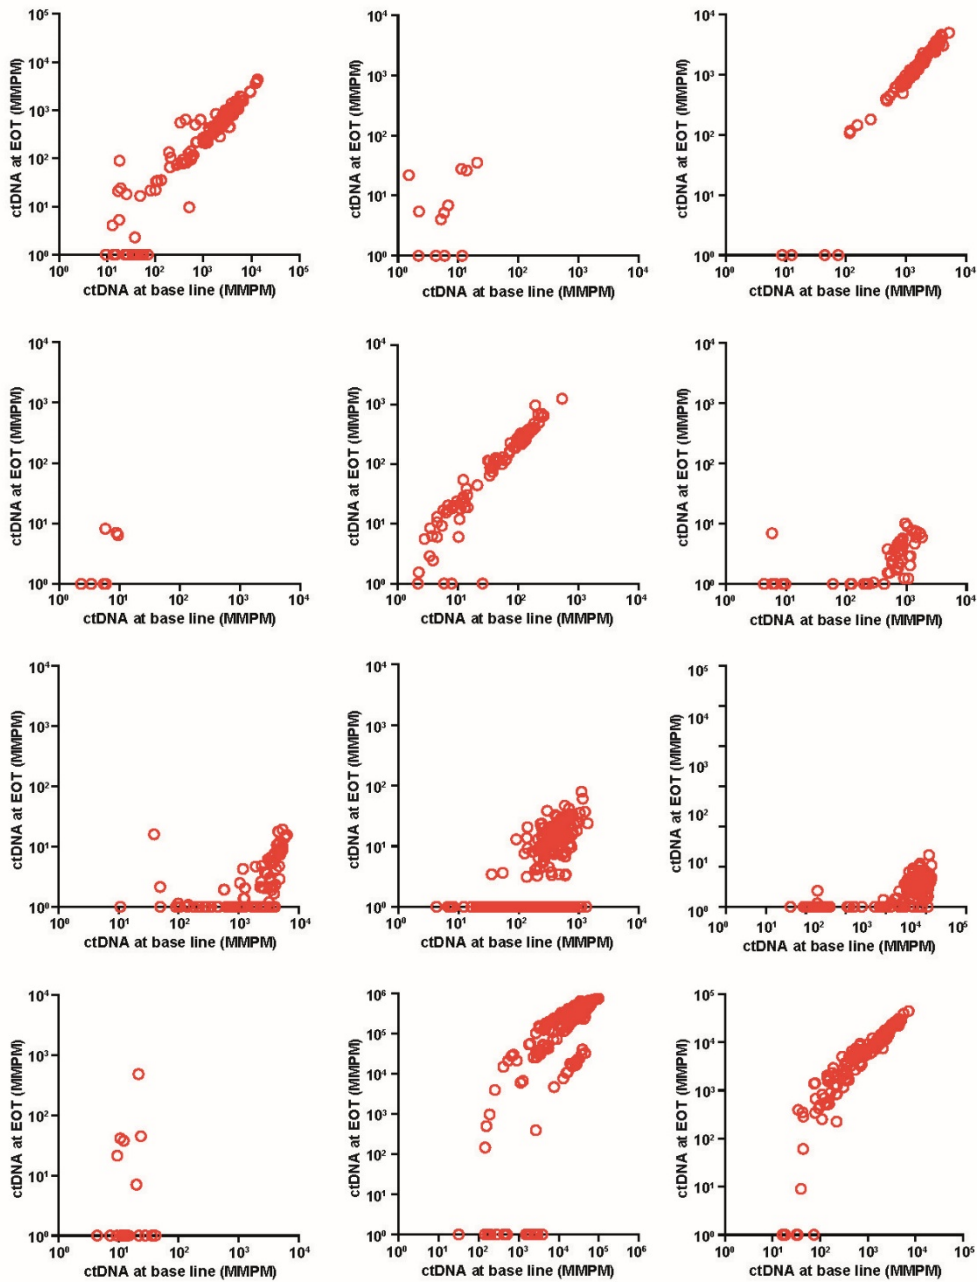

\*All variants of ctDNA are shown.

ctDNA, circulating tumor DNA; EOT, end of treatment; MMPM, mutant molecules per mL.
